## CORRECTION

# Correction: Figures of merit and statistics for detecting faulty species identification with DNA barcodes: A case study in *Ramaria* and related fungal genera

María P. Martín, Pablo P. Daniëls, David Erickson, John L. Spouge

The Funding statement is incorrect. The correct Funding statement is as follows: “This study was funded by the U.S. National Library of Medicine (JS), Flora Micológica Ibérica PB95-0129-C03-01 and PB98-0538-C04-01 (PD), and Plan Nacional I+D+I CGL-2015-67459-P (MM.)”

## Reference

1. Martín MP, Daniëls PP, Erickson D, Spouge JL (2020) Figures of merit and statistics for detecting faulty species identification with DNA barcodes: A case study in *Ramaria* and related fungal genera. PLoS ONE 15(8): e0237507. <https://doi.org/10.1371/journal.pone.0237507>

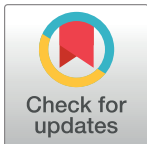

## OPEN ACCESS

**Citation:** Martín MP, Daniëls PP, Erickson D, Spouge JL (2021) Correction: Figures of merit and statistics for detecting faulty species identification with DNA barcodes: A case study in *Ramaria* and related fungal genera. PLoS ONE 16(4): e0250030. <https://doi.org/10.1371/journal.pone.0250030>

**Published:** April 7, 2021

**Copyright:** © 2021 Martín et al. This is an open access article distributed under the terms of the [Creative Commons Attribution License](https://creativecommons.org/licenses/by/4.0/), which permits unrestricted use, distribution, and reproduction in any medium, provided the original author and source are credited.
